# Supplementary material
Source: publisher site journal article supplement (https://www.dovepress.com/article/439655)
Supplement: Supplementary file 1 [file get_supplementary_file.php]

**Supplementary Table 1 List of significant DEGs containing 86 up-regulated genes and 114**

| down-regulated genes |             |             |              |             |             |
|----------------------|-------------|-------------|--------------|-------------|-------------|
| ID                   | logFC       | adj.P.Val   | ID           | logFC       | adj.P.Val   |
| PITX2                | 2.317023077 | 3.06E-22    | ODC1         | 0.566215385 | 0.000320017 |
| ZIC2                 | 2.542992308 | 5.92E-21    | PI3          | 1.550819231 | 0.000433323 |
| HOXD11               | 1.981573077 | 1.26E-20    | ASPN         | 0.627121154 | 0.000559366 |
| HOXD10               | 1.393120577 | 5.59E-18    | AFAP1L2      | 0.519846154 | 0.000605678 |
| HOXD8                | 1.430192308 | 5.86E-16    | HSD17B2      | 0.765623077 | 0.00074201  |
| PLAG1                | 1.027534615 | 1.23E-12    | ADM          | 0.774903846 | 0.001020833 |
| HOXB7                | 0.948083346 | 1.91E-10    | DSC2         | 0.557450962 | 0.001046279 |
| SLC1A3               | 0.619634615 | 8.22E-10    | KRT15        | 0.993065385 | 0.001388729 |
| SBF2-AS1             | 0.586296154 | 1.58E-09    | DLX2         | 0.522557692 | 0.00150002  |
| HOXD-AS2             | 0.831319231 | 2.03E-09    | NRN1         | 0.694111538 | 0.00150448  |
| PCDH7                | 0.728637692 | 9.34E-09    | STK39        | 0.567923077 | 0.001642042 |
| FOXF2                | 0.846011538 | 1.23E-08    | LRMP         | 0.635244231 | 0.001732497 |
| COL4A6               | 0.733255115 | 2.43E-08    | SRPX         | 0.541469231 | 0.001886103 |
| PAX6                 | 1.613711538 | 2.65E-08    | PTX3         | 0.933173077 | 0.00217769  |
| BPGM                 | 0.884373077 | 3.79E-08    | NGFR         | 0.643134615 | 0.00312671  |
| KCNJ2                | 0.658961538 | 1.29E-07    | ARL14        | 0.509192308 | 0.003264903 |
| GHR                  | 0.663988462 | 1.76E-07    | PLA2G2A      | 1.109030769 | 0.004082487 |
| PMAIP1               | 0.690930769 | 3.30E-07    | P2RY2        | 0.512496154 | 0.004701358 |
| HENMT1               | 0.718292308 | 4.33E-07    | MAT1A        | 0.504515385 | 0.005120616 |
| THBS2                | 0.801453846 | 7.48E-07    | S100A2       | 0.510046154 | 0.005465285 |
| ISL2                 | 1.006907692 | 8.25E-07    | FMO1         | 0.564188462 | 0.006062777 |
| STARD3NL             | 0.586546154 | 1.60E-06    | LGR6         | 0.578703846 | 0.006193931 |
| MTCL1                | 0.795280769 | 2.17E-06    | HMCN1        | 0.518076923 | 0.006472828 |
| FLJ32255             | 0.622665385 | 2.71E-06    | BMP2         | 0.500851923 | 0.009563274 |
| DEPDC7               | 0.927546154 | 3.81E-06    | LOC100506388 | 0.531238462 | 0.010315475 |
| PYGL                 | 0.534553846 | 6.71E-06    | SFRP4        | 0.697253846 | 0.01090746  |
| LOC100506563         | 0.565676923 | 7.66E-06    | ANXA3        | 0.635034615 | 0.014680863 |
| KCNS1                | 0.771611538 | 9.81E-06    | TRBC1        | 0.509006308 | 0.017331195 |
| EN2                  | 0.805680769 | 1.02E-05    | ST6GAL2      | 0.580944231 | 0.017534324 |
| ABHD3                | 0.518396154 | 1.36E-05    | C15orf48     | 0.921615385 | 0.017572789 |
| LTBP2                | 0.506526923 | 1.81E-05    | CLIC2        | 0.556861538 | 0.019516762 |
| IGFL2                | 0.746946154 | 1.88E-05    | AOX1         | 0.517161538 | 0.019870454 |
| LMO1                 | 0.595692308 | 2.15E-05    | ABCG2        | 0.589846154 | 0.020933733 |
| PITX1                | 0.615236538 | 3.76E-05    | PNLIPRP3     | 0.513084615 | 0.020950553 |
| DLX1                 | 0.633880769 | 4.15E-05    | CCL27        | 0.588473077 | 0.022816633 |
| FABP7                | 1.397984615 | 4.91E-05    | APOBEC3B     | 0.66535     | 0.023865117 |
| CXCR2                | 0.595980769 | 6.55E-05    | LYZ          | 0.569403846 | 0.025803664 |
| PAPLN                | 0.500167308 | 7.83E-05    | CCL19        | 0.976530769 | 0.034827192 |
| DRAM1                | 0.546369231 | 0.000115904 | CCL18        | 0.733838462 | 0.035375442 |
| PLAU                 | 0.544475    | 0.000123438 | KRT31        | 0.877830769 | 0.041032148 |
| GEM                  | 0.755976923 | 0.000225965 | RSPO3        | 0.704542308 | 0.044028743 |
| IGFBP3               | 1.099946154 | 0.000263091 | CCL2         | 0.547142308 | 0.049143589 |
| ACOT4                | 0.511746154 | 0.000274383 | MT1M         | 0.648934615 | 0.049681699 |

|            |              |          |               |              |             |
|------------|--------------|----------|---------------|--------------|-------------|
| WBP5       | -0.916723077 | 8.43E-15 | TMEM99        | -0.794884615 | 0.000199914 |
| BEX2       | -1.091684615 | 5.40E-12 | RNASE7        | -0.906807615 | 0.000202275 |
| NMNAT3     | -0.640173077 | 2.61E-11 | LOC286189     | -0.525465385 | 0.000203751 |
| NGFRAP1    | -0.832123077 | 4.13E-11 | HS3ST6        | -0.5592      | 0.000224368 |
| TRAM1L1    | -1.252238462 | 1.83E-10 | LOC100288860  | -0.606284615 | 0.000240304 |
| CYP39A1    | -1.671424423 | 1.91E-10 | IL18R1        | -0.511988462 | 0.000268311 |
| PON2       | -0.512871731 | 4.05E-10 | NFE2          | -1.032288462 | 0.000285746 |
| KIF21A     | -0.865709615 | 6.35E-09 | CCDC178       | -1.087176923 | 0.000285746 |
| INSIG2     | -0.606419231 | 9.34E-09 | SLC6A14       | -0.653388462 | 0.000291884 |
| MOXD1      | -0.6907025   | 1.28E-08 | TNNT1         | -0.752180769 | 0.00034603  |
| AMDHD1     | -1.427884615 | 1.69E-08 | UPK1B         | -0.542790385 | 0.000367508 |
| SP8        | -0.880744231 | 3.19E-08 | FLRT3         | -0.765413462 | 0.000384499 |
| HOXA1      | -0.547434615 | 3.44E-08 | CARD18        | -0.870080769 | 0.000534406 |
| WFDC21P    | -0.631169231 | 3.61E-08 | CPM           | -0.502757    | 0.000700716 |
| UBASH3B    | -0.573484615 | 4.61E-08 | MLF1          | -0.642523077 | 0.000846819 |
| HPGD       | -0.5623      | 4.61E-08 | XKRX          | -0.513526923 | 0.000873353 |
| SIMC1      | -0.54565     | 6.03E-08 | PLS1          | -0.515123077 | 0.000879046 |
| SLC1A6     | -1.527528192 | 6.31E-08 | ALOX12B       | -0.599342308 | 0.000885182 |
| PLOD2      | -0.841865385 | 6.96E-08 | AQP9          | -0.511315385 | 0.000889097 |
| ASGR1      | -0.601661538 | 9.30E-08 | IL37          | -0.680011538 | 0.000929785 |
| TMEM231    | -0.507626923 | 2.49E-07 | ACER1         | -0.522261538 | 0.000966447 |
| GGH        | -0.992638462 | 2.49E-07 | HRASLS        | -1.042728846 | 0.001147163 |
| CHMP4C     | -0.628796154 | 2.95E-07 | AZGP1         | -0.530753846 | 0.001173538 |
| CDH12      | -0.8949      | 3.09E-07 | LOC100130476  | -0.602892308 | 0.00135444  |
| AF131215.8 | -0.798965385 | 3.29E-07 | C2CD2         | -0.510438462 | 0.001529431 |
| ANKFN1     | -0.549236538 | 3.30E-07 | BTC           | -1.054619231 | 0.001551762 |
| MDFIC      | -0.612607731 | 3.40E-07 | GDA           | -0.984751923 | 0.001836922 |
| TRPS1      | -0.623153846 | 3.59E-07 | C10orf99      | -1.067301923 | 0.001947407 |
| PABPC4L    | -0.657103846 | 4.53E-07 | PCP4L1        | -0.510342308 | 0.001991569 |
| SLC35G1    | -0.663450038 | 4.72E-07 | RNF180        | -0.503633308 | 0.002016851 |
| LRP12      | -0.568455269 | 5.06E-07 | CDHR1         | -0.700338462 | 0.002187563 |
| GATA3      | -0.517738385 | 5.78E-07 | NDRG4         | -0.616176923 | 0.002247356 |
| PON3       | -1.124953846 | 5.78E-07 | WFDC12        | -0.892069231 | 0.002574636 |
| KCNMB4     | -0.661492154 | 8.25E-07 | CYP7B1        | -0.549569231 | 0.002586907 |
| CACNA2D1   | -0.522401923 | 9.42E-07 | AGPAT9        | -0.511034615 | 0.003051924 |
| UBE2E2     | -0.686615385 | 1.10E-06 | SLC45A4       | -0.629257692 | 0.004017593 |
| MUC15      | -0.606540385 | 1.44E-06 | CSRP2         | -0.681638462 | 0.004542298 |
| RUNDC3B    | -1.60605     | 1.52E-06 | TMEM170B      | -0.563288462 | 0.004617748 |
| TUSC3      | -0.519043846 | 1.60E-06 | E2F8          | -0.690342308 | 0.004838269 |
| CHL1       | -0.94865     | 1.92E-06 | PSG7          | -0.737892308 | 0.005021057 |
| ACADL      | -0.762480769 | 2.17E-06 | GBP6          | -0.510623077 | 0.005473216 |
| ROBO1      | -0.522988462 | 2.39E-06 | C5orf46       | -0.736042308 | 0.005730979 |
| CES4A      | -0.547680769 | 2.46E-06 | RASGRP1       | -0.611976923 | 0.006386657 |
| DLX5       | -0.643638462 | 2.71E-06 | HSD11B1       | -0.726153846 | 0.006759472 |
| SLC47A2    | -1.540965385 | 2.74E-06 | SLC16A14      | -0.695242308 | 0.007352273 |
| SLURP1     | -0.539007692 | 3.82E-06 | RP11-999E24.3 | -0.682384615 | 0.007527342 |

|         |              |             |           |              |             |
|---------|--------------|-------------|-----------|--------------|-------------|
| PLAGL1  | -0.640276885 | 3.97E-06    | SLC46A2   | -0.688107692 | 0.007801763 |
| NUDT11  | -0.562288462 | 5.40E-06    | CRNN      | -0.554373077 | 0.008082634 |
| NELL2   | -1.269253846 | 1.99E-05    | ALDH3A1   | -0.70595     | 0.013969591 |
| ENTPD3  | -0.525259615 | 2.24E-05    | CHRNA9    | -0.770234615 | 0.01607223  |
| CHP2    | -0.545011538 | 4.43E-05    | LOC338667 | -0.949038462 | 0.016574411 |
| BCHE    | -1.194723077 | 5.82E-05    | BLMH      | -0.703180769 | 0.023341202 |
| CLCA4   | -0.880823077 | 8.26E-05    | CASP14    | -0.500496154 | 0.027651475 |
| NPY1R   | -0.879276923 | 0.000102104 | ADAMTS3   | -0.515073077 | 0.028933103 |
| SLITRK6 | -0.782489692 | 0.000139114 | LCE1E     | -0.650344231 | 0.030478217 |
| CYP2J2  | -0.639       | 0.000148773 | PSG4      | -0.661123077 | 0.046280861 |
| GPT2    | -0.574084615 | 0.000181479 | MAP7D2    | -0.539146154 | 0.047143025 |

---

Supplementary Table 2 GSEA results based on Gene Ontology gene sets

| Category | Description                                                                                                                                                                                  | enrichmentScore | NES          | p.adjust    | qvalue      |
|----------|----------------------------------------------------------------------------------------------------------------------------------------------------------------------------------------------|-----------------|--------------|-------------|-------------|
| GOMF     | GOMF_TUBULIN_BINDING                                                                                                                                                                         | -0.331920513    | -1.378067543 | 0.047829533 | 0.040959023 |
| GOMF     | GOMF_SULFUR_COMPOUND_BINDING                                                                                                                                                                 | 0.404948656     | 1.525006134  | 0.035700308 | 0.03057211  |
| GOMF     | GOMF_SIGNALING_RECEPTOR_REGULATOR_ACTIVITY                                                                                                                                                   | 0.379844784     | 1.508916802  | 0.006173531 | 0.005286729 |
| GOMF     | GOMF_SERINE_HYDROLASE_ACTIVITY                                                                                                                                                               | 0.435169978     | 1.570412885  | 0.044435086 | 0.038052175 |
| GOMF     | GOMF_R_SMAD_BINDING                                                                                                                                                                          | 0.743683521     | 1.931440345  | 0.009090459 | 0.007784653 |
| GOMF     | GOMF_PROTEOGLYCAN_BINDING                                                                                                                                                                    | 0.647667059     | 1.800287885  | 0.037457761 | 0.032077112 |
| GOMF     | GOMF_OXIDOREDUCTASE_ACTIVITY_ACTING_ON_PAIRED_DONORS_WITH_INCORPORATION_OR_REDUCTION_OF_MOLECULAR_OXYGEN_REDUCED_FLAVIN_OR_FLAVOPROTEIN_AS_ONE_DONOR_AND_INCORPORATION_OF_ONE_ATOM_OF_OXYGEN | -0.655607465    | -1.95405367  | 0.01466115  | 0.012555138 |
| GOMF     | GOMF_OXIDOREDUCTASE_ACTIVITY_ACTING_ON_PAIRED_DONORS_WITH_INCORPORATION_OR_REDUCTION_OF_MOLECULAR_OXYGEN                                                                                     | -0.416218659    | -1.58852113  | 0.041290593 | 0.035359374 |
| GOMF     | GOMF_MONOOXYGENASE_ACTIVITY                                                                                                                                                                  | -0.464307572    | -1.646183935 | 0.045014213 | 0.038548113 |
| GOMF     | GOMF_MICROTUBULE_BINDING                                                                                                                                                                     | -0.377185986    | -1.513353861 | 0.026920393 | 0.023053393 |
| GOMF     | GOMF_MHC_PROTEIN_COMPLEX_BINDING                                                                                                                                                             | 0.682859537     | 1.835403296  | 0.031101076 | 0.026633539 |
| GOMF     | GOMF_MHC_CLASS_II_PROTEIN_COMPLEX_BINDING                                                                                                                                                    | 0.737058008     | 1.882338899  | 0.023806676 | 0.020386948 |
| GOMF     | GOMF_INTEGRIN_BINDING                                                                                                                                                                        | 0.561732242     | 1.995020475  | 0.000179698 | 0.000153885 |
| GOMF     | GOMF_INSULIN_LIKE_GROWTH_FACTOR_I_BINDING                                                                                                                                                    | 0.880636266     | 2.039489789  | 0.004356058 | 0.003730329 |
| GOMF     | GOMF_INSULIN_LIKE_GROWTH_FACTOR_BINDING                                                                                                                                                      | 0.815840126     | 2.093163792  | 0.002208085 | 0.001890903 |
| GOMF     | GOMF_IMMUNE_RECEPTOR_ACTIVITY                                                                                                                                                                | 0.502654196     | 1.76318218   | 0.007154211 | 0.006126539 |
| GOMF     | GOMF_HEPARIN_BINDING                                                                                                                                                                         | 0.473858802     | 1.688839744  | 0.020653793 | 0.017686963 |
| GOMF     | GOMF_GROWTH_FACTOR_BINDING                                                                                                                                                                   | 0.487666186     | 1.69227963   | 0.017240666 | 0.014764117 |
| GOMF     | GOMF_GLYCOSAMINOGLYCAN_BINDING                                                                                                                                                               | 0.432129993     | 1.601874304  | 0.01685455  | 0.014433466 |
| GOMF     | GOMF_G_PROTEIN_COUPLED_RECEPTOR_BINDING                                                                                                                                                      | 0.46503134      | 1.760035173  | 0.002208085 | 0.001890903 |
| GOMF     | GOMF_FRIZZLED_BINDING                                                                                                                                                                        | 0.658581334     | 1.841652002  | 0.024015333 | 0.020565632 |
| GOMF     | GOMF_FIBRONECTIN_BINDING                                                                                                                                                                     | 0.726894794     | 1.966547881  | 0.013562982 | 0.011614717 |
| GOMF     | GOMF_EXTRACELLULAR_MATRIX_STRUCTURAL_CONSTITUENT                                                                                                                                             | 0.607506264     | 2.185356611  | 2.92E-07    | 2.50E-07    |
| GOMF     | GOMF_EXTRACELLULAR_MATRIX_BINDING                                                                                                                                                            | 0.633627451     | 1.90846265   | 0.018135403 | 0.015530329 |
| GOMF     | GOMF_ENDOPEPTIDASE_ACTIVITY                                                                                                                                                                  | 0.377483756     | 1.478484648  | 0.027989324 | 0.023968776 |
| GOMF     | GOMF_DNA_BINDING_TRANSCRIPTION_ACTIVATOR_ACTIVITY                                                                                                                                            | 0.373838548     | 1.47953182   | 0.018371357 | 0.01573239  |
| GOMF     | GOMF_CYTOSKELETAL_MOTOR_ACTIVITY                                                                                                                                                             | -0.455873438    | -1.655769995 | 0.039202749 | 0.033571441 |
| GOMF     | GOMF_CYTOKINE_BINDING                                                                                                                                                                        | 0.496170734     | 1.749550554  | 0.006695818 | 0.005733992 |
| GOMF     | GOMF_CYTOKINE_ACTIVITY                                                                                                                                                                       | 0.457120924     | 1.696846003  | 0.005977518 | 0.005118873 |
| GOMF     | GOMF_CORECEPTOR_ACTIVITY                                                                                                                                                                     | 0.621949784     | 1.817526155  | 0.031639951 | 0.027095006 |
| GOMF     | GOMF_COLLAGEN_BINDING                                                                                                                                                                        | 0.713451851     | 2.244158574  | 4.26E-05    | 3.65E-05    |
| GOMF     | GOMF_CHEMOKINE_RECEPTOR_BINDING                                                                                                                                                              | 0.617888469     | 1.884605445  | 0.016160375 | 0.013839006 |
| GOMF     | GOMF_CHEMOKINE_BINDING                                                                                                                                                                       | 0.683449969     | 1.879853503  | 0.026889721 | 0.023027127 |
| GOMF     | GOMF_CHEMOKINE_ACTIVITY                                                                                                                                                                      | 0.65456481      | 1.902992123  | 0.01685455  | 0.014433466 |
| GOMF     | GOMF_CCR_CHEMOKINE_RECEPTOR_BINDING                                                                                                                                                          | 0.765085975     | 2.069870654  | 0.003070741 | 0.002629642 |
| GOMF     | GOMF_C_C_CHEMOKINE_BINDING                                                                                                                                                                   | 0.69259827      | 1.798765473  | 0.038613879 | 0.033067159 |
| GOMF     | GOMF_ANTIGEN_BINDING                                                                                                                                                                         | 0.631984057     | 1.99785175   | 0.006472144 | 0.005542448 |
| GOCC     | GOCC_VESICLE_LUMEN                                                                                                                                                                           | 0.425603957     | 1.644854989  | 0.003723695 | 0.003188802 |
| GOCC     | GOCC_PROTEIN_COMPLEX_INVOLVED_IN_CELL_ADHESION                                                                                                                                               | 0.711492935     | 2.059038983  | 0.00155929  | 0.001335305 |
| GOCC     | GOCC_PLATELET_ALPHA_GRANULE_LUMEN                                                                                                                                                            | 0.627904072     | 1.967235796  | 0.003286043 | 0.002814017 |
| GOCC     | GOCC_PLATELET_ALPHA_GRANULE                                                                                                                                                                  | 0.617687631     | 2.038726826  | 0.000712006 | 0.000609729 |
| GOCC     | GOCC_MICROTUBULE                                                                                                                                                                             | -0.353209669    | -1.481455771 | 0.007865622 | 0.006735758 |

|      |                                                                               |              |              |             |             |
|------|-------------------------------------------------------------------------------|--------------|--------------|-------------|-------------|
| GOCC | GOCC_MHC_PROTEIN_COMPLEX                                                      | 0.720917984  | 1.82631232   | 0.046838097 | 0.040110003 |
| GOCC | GOCC_MHC_CLASS_II_PROTEIN_COMPLEX                                             | 0.819408176  | 1.897689967  | 0.038613879 | 0.033067159 |
| GOCC | GOCC_MEMBRANE_MICRODOMAIN                                                     | 0.406496304  | 1.573368885  | 0.015897523 | 0.013613911 |
| GOCC | GOCC_LAMELLAR_BODY                                                            | -0.794124693 | -1.936680128 | 0.019300075 | 0.016528279 |
| GOCC | GOCC_KINESIN_COMPLEX                                                          | -0.585325891 | -1.851898676 | 0.017843563 | 0.015280411 |
| GOCC | GOCC KERATIN FILAMENT                                                         | 0.811625681  | 2.525412315  | 9.56E-08    | 8.19E-08    |
| GOCC | GOCC_INTERMEDIATE_FILAMENT_CYTOSKELETON                                       | 0.678375014  | 2.439849603  | 9.56E-08    | 8.19E-08    |
| GOCC | GOCC_INTERMEDIATE_FILAMENT                                                    | 0.74874529   | 2.62293617   | 9.56E-08    | 8.19E-08    |
| GOCC | GOCC_EXTERNAL_SIDE_OF_PLASMA_MEMBRANE                                         | 0.504828287  | 1.963143453  | 1.08E-07    | 9.24E-08    |
| GOCC | GOCC_ENDOPLASMIC_RETICULUM_LUMEN                                              | 0.484789064  | 1.864144209  | 5.11E-05    | 4.38E-05    |
| GOCC | GOCC_COLLAGEN_TRIMER                                                          | 0.570032789  | 1.851652954  | 0.013260009 | 0.011355265 |
| GOCC | GOCC_COLLAGEN_CONTAINING_EXTRACELLULAR_MATRIX                                 | 0.565677344  | 2.226674307  | 9.56E-08    | 8.19E-08    |
| GOCC | GOCC_CELL_SUBSTRATE_JUNCTION                                                  | 0.396828919  | 1.561571189  | 0.006472144 | 0.005542448 |
| GOCC | GOCC_BASEMENT_MEMBRANE                                                        | 0.620320686  | 2.066055526  | 0.000720891 | 0.000617338 |
| GOCC | GOCC_AUTOPHAGOSOME_MEMBRANE                                                   | -0.573978377 | -1.815996546 | 0.025650833 | 0.0219662   |
| GOBP | GOBP_ZINC_ION_HOMEOSTASIS                                                     | 0.635199368  | 1.789878765  | 0.041469614 | 0.03551268  |
| GOBP | GOBP_WOUND_HEALING                                                            | 0.393201321  | 1.548280841  | 0.010127277 | 0.008672536 |
| GOBP | GOBP_WNT_SIGNALING_PATHWAY_INVOLVED_IN_HEART_DEVELOPMENT                      | 0.837458511  | 1.79622861   | 0.024130432 | 0.020664198 |
| GOBP | GOBP_VIRAL_LIFE_CYCLE                                                         | 0.409849459  | 1.576075608  | 0.015167819 | 0.012989026 |
| GOBP | GOBP_VIRAL_GENOME_REPLICATION                                                 | 0.535863637  | 1.847287289  | 0.005011482 | 0.004291604 |
| GOBP | GOBP_VENTRAL_SPINAL_CORD_DEVELOPMENT                                          | 0.660532868  | 1.934751737  | 0.01033363  | 0.008849248 |
| GOBP | GOBP_UROGENITAL_SYSTEM_DEVELOPMENT                                            | 0.436410813  | 1.692033255  | 0.000932503 | 0.000798553 |
| GOBP | GOBP_UMP_BIOSYNTHETIC_PROCESS                                                 | 0.81243362   | 1.7425538    | 0.047720045 | 0.040865263 |
| GOBP | GOBP_TRANSMEMBRANE_RECEPTOR_PROTEIN_SERINE_THREONINE_KINASE_SIGNALING_PATHWAY | 0.409706304  | 1.585821215  | 0.005778587 | 0.004948518 |
| GOBP | GOBP_TRANSITION_METAL_ION_HOMEOSTASIS                                         | 0.490741829  | 1.699846398  | 0.022204517 | 0.019014932 |
| GOBP | GOBP_TRANSFORMING_GROWTH_FACTOR_BETA_RECEPTOR_SIGNALING_PATHWAY               | 0.427364954  | 1.553588794  | 0.028995505 | 0.024830424 |
| GOBP | GOBP_TRANSFORMING_GROWTH_FACTOR_BETA_PRODUCTION                               | 0.675327193  | 1.95437642   | 0.006472144 | 0.005542448 |
| GOBP | GOBP_TISSUE_MIGRATION                                                         | 0.432711755  | 1.662321125  | 0.002681949 | 0.002296698 |
| GOBP | GOBP_TELENCEPHALON_REGIONALIZATION                                            | 0.844797481  | 1.913865453  | 0.020871514 | 0.01787341  |
| GOBP | GOBP_T_CELL_ACTIVATION                                                        | 0.404176564  | 1.605239347  | 0.000713347 | 0.000610877 |
| GOBP | GOBP_SYNAPSE_PRUNING                                                          | 0.825759424  | 1.813368545  | 0.047017588 | 0.040263711 |
| GOBP | GOBP_STEROL_METABOLIC_PROCESS                                                 | -0.43873722  | -1.648778706 | 0.019151823 | 0.016400745 |
| GOBP | GOBP_STEROID_METABOLIC_PROCESS                                                | -0.352918161 | -1.436056222 | 0.040129438 | 0.034365014 |
| GOBP | GOBP_SPHINGOLIPID_METABOLIC_PROCESS                                           | -0.478499736 | -1.798206626 | 0.004356058 | 0.003730329 |
| GOBP | GOBP_SPHINGOLIPID_BIOSYNTHETIC_PROCESS                                        | -0.49855033  | -1.767590265 | 0.013562982 | 0.011614717 |
| GOBP | GOBP_SMOOTH_MUSCLE_CELL_MIGRATION                                             | 0.614544479  | 1.942721103  | 0.013260009 | 0.011355265 |
| GOBP | GOBP_SMALL_MOLECULE_CATABOLIC_PROCESS                                         | -0.343728147 | -1.430667147 | 0.029514302 | 0.025274697 |
| GOBP | GOBP_SKELETAL_SYSTEM_MORPHOGENESIS                                            | 0.454439935  | 1.686894096  | 0.006347957 | 0.0054361   |
| GOBP | GOBP_SKELETAL_SYSTEM_DEVELOPMENT                                              | 0.432431217  | 1.726261978  | 4.16E-05    | 3.56E-05    |
| GOBP | GOBP_SENSORY_SYSTEM_DEVELOPMENT                                               | 0.378745895  | 1.4845847    | 0.013795007 | 0.011813413 |
| GOBP | GOBP_SECONDARY_ALCOHOL_METABOLIC_PROCESS                                      | -0.449705822 | -1.695192134 | 0.016620965 | 0.014233434 |
| GOBP | GOBP_SALIVARY_GLAND_DEVELOPMENT                                               | 0.643083852  | 1.787548172  | 0.040129438 | 0.034365014 |
| GOBP | GOBP_RESPONSE_TO_VIRUS                                                        | 0.483828287  | 1.875878247  | 7.55E-06    | 6.46E-06    |
| GOBP | GOBP_RESPONSE_TO_TYPE_I_INTERFERON                                            | 0.556625461  | 1.724587896  | 0.040129438 | 0.034365014 |
| GOBP | GOBP_RESPONSE_TO_TUMOR_NECROSIS_FACTOR                                        | 0.447102777  | 1.657787812  | 0.009496041 | 0.008131975 |
| GOBP | GOBP_RESPONSE_TO_TRANSFORMING_GROWTH_FACTOR_BETA                              | 0.457335608  | 1.720443322  | 0.003070741 | 0.002629642 |

|      |                                                                                             |              |              |             |             |
|------|---------------------------------------------------------------------------------------------|--------------|--------------|-------------|-------------|
| GOBP | GOBP_RESPONSE_TO_STEROID_HORMONE                                                            | 0.39587218   | 1.531181725  | 0.027557743 | 0.02359919  |
| GOBP | GOBP_RESPONSE_TO_PROSTAGLANDIN_E                                                            | 0.720171394  | 1.84771089   | 0.049034621 | 0.041991006 |
| GOBP | GOBP_RESPONSE_TO_OXYGEN_LEVELS                                                              | 0.422270948  | 1.625455842  | 0.006792196 | 0.005816526 |
| GOBP | GOBP_RESPONSE_TO_MOLECULE_OF_BACTERIAL_ORIGIN                                               | 0.381814223  | 1.477914542  | 0.044478196 | 0.038089092 |
| GOBP | GOBP_RESPONSE_TO_KETONE                                                                     | 0.450384317  | 1.63242073   | 0.01930075  | 0.016528279 |
| GOBP | GOBP_RESPONSE_TO_INTERLEUKIN_1                                                              | 0.520272923  | 1.798082396  | 0.00521506  | 0.004465939 |
| GOBP | GOBP_RESPONSE_TO_INTERFERON_GAMMA                                                           | 0.573982346  | 1.987833278  | 0.000509518 | 0.000436328 |
| GOBP | GOBP_RESPONSE_TO_CHEMOKINE                                                                  | 0.666693579  | 2.216872972  | 2.17E-05    | 1.86E-05    |
| GOBP | GOBP_RESPONSE_TO_BMP                                                                        | 0.452629014  | 1.61293178   | 0.038613879 | 0.033067159 |
| GOBP | GOBP_RESPIRATORY_ELECTRON_TRANSPORT_CHAIN                                                   | 0.587711212  | 1.949968052  | 0.006075722 | 0.005202971 |
| GOBP | GOBP_REGULATION_OF_WNT_SIGNALING_PATHWAY_PLANAR_CELL_POLARITY_PATHWAY                       | 0.793709817  | 1.896265238  | 0.025216395 | 0.021594167 |
| GOBP | GOBP_REGULATION_OF_WATER_LOSS_VIA_SKIN                                                      | -0.691070386 | -1.902944399 | 0.027656749 | 0.023683974 |
| GOBP | GOBP_REGULATION_OF_VIRAL_GENOME_REPLICATION                                                 | 0.537875793  | 1.750793139  | 0.026669504 | 0.022838543 |
| GOBP | GOBP_REGULATION_OF_VASCULATURE_DEVELOPMENT                                                  | 0.443035697  | 1.684856271  | 0.005867476 | 0.005024638 |
| GOBP | GOBP_REGULATION_OF_TRANSMEMBRANE_RECEPTOR_PROTEIN_SERINE_THREONINE_KINASE_SIGNALING_PATHWAY | 0.435247644  | 1.639109842  | 0.008372598 | 0.00716991  |
| GOBP | GOBP_REGULATION_OF_TAU_PROTEIN_KINASE_ACTIVITY                                              | 0.824365174  | 1.81030677   | 0.047187271 | 0.04040902  |
| GOBP | GOBP_REGULATION_OF_T_CELL_PROLIFERATION                                                     | 0.453967903  | 1.625494804  | 0.031906663 | 0.027323406 |
| GOBP | GOBP_REGULATION_OF_T_CELL_ACTIVATION                                                        | 0.420069344  | 1.625904169  | 0.007610648 | 0.006517411 |
| GOBP | GOBP_REGULATION_OF_PEPTIDASE_ACTIVITY                                                       | 0.369632457  | 1.455134625  | 0.033583503 | 0.028759375 |
| GOBP | GOBP_REGULATION_OF_OSTEOBLAST_PROLIFERATION                                                 | 0.758938577  | 1.971059659  | 0.005987966 | 0.00512782  |
| GOBP | GOBP_REGULATION_OF_OSTEOBLAST_DIFFERENTIATION                                               | 0.500239731  | 1.709497964  | 0.013562982 | 0.011614717 |
| GOBP | GOBP_REGULATION_OF_NON_CANONICAL_WNT_SIGNALING_PATHWAY                                      | 0.752198799  | 1.95889187   | 0.008319361 | 0.00712432  |
| GOBP | GOBP_REGULATION_OF_NEUROTRANSMITTER_LEVELS                                                  | -0.376860193 | -1.486513175 | 0.044677041 | 0.038259373 |
| GOBP | GOBP_REGULATION_OF_MYELOID_LEUKOCYTE_DIFFERENTIATION                                        | 0.489564227  | 1.671192543  | 0.047692236 | 0.040841448 |
| GOBP | GOBP_REGULATION_OF_MORPHOGENESIS_OF_A_BRANCHING_STRUCTURE                                   | 0.627972298  | 1.917078071  | 0.013562982 | 0.011614717 |
| GOBP | GOBP_REGULATION_OF_MONONUCLEAR_CELL_MIGRATION                                               | 0.500992552  | 1.710204648  | 0.031472689 | 0.026951771 |
| GOBP | GOBP_REGULATION_OF_MACROPHAGE_MIGRATION                                                     | 0.724809107  | 2.042383059  | 0.002031115 | 0.001739354 |
| GOBP | GOBP_REGULATION_OF_MACROPHAGE_CHEMOTAXIS                                                    | 0.720619024  | 1.894991188  | 0.01930075  | 0.016528279 |
| GOBP | GOBP_REGULATION_OF_LYMPHOCYTE_ACTIVATION                                                    | 0.426122032  | 1.68680988   | 0.000444793 | 0.0003809   |
| GOBP | GOBP_REGULATION_OF_LEUKOCYTE_PROLIFERATION                                                  | 0.485144585  | 1.820474078  | 0.000509518 | 0.000436328 |
| GOBP | GOBP_REGULATION_OF_LEUKOCYTE_MIGRATION                                                      | 0.511843861  | 1.881698403  | 0.000472806 | 0.00040489  |
| GOBP | GOBP_REGULATION_OF_LEUKOCYTE_DIFFERENTIATION                                                | 0.405450526  | 1.548113808  | 0.02668864  | 0.02285493  |
| GOBP | GOBP_REGULATION_OF_LEUKOCYTE_CHEMOTAXIS                                                     | 0.577133621  | 1.985508729  | 0.000712006 | 0.000609729 |
| GOBP | GOBP_REGULATION_OF_INSULIN_LIKE_GROWTH_FACTOR_RECEPTOR_SIGNALING_PATHWAY                    | 0.810377274  | 2.052940878  | 0.003639945 | 0.003117082 |
| GOBP | GOBP_REGULATION_OF_HORMONE_BIOSYNTHETIC_PROCESS                                             | 0.737982367  | 1.869541778  | 0.031363765 | 0.026858494 |
| GOBP | GOBP_REGULATION_OF_HEMOPOIESIS                                                              | 0.372128404  | 1.437636078  | 0.048275428 | 0.041340868 |
| GOBP | GOBP_REGULATION_OF GRANULOCYTE DIFFERENTIATION                                              | 0.823137379  | 1.921130781  | 0.012792756 | 0.010955131 |
| GOBP | GOBP_REGULATION_OF_EXTRINSIC_APOPTOTIC_SIGNALING_PATHWAY                                    | 0.499626093  | 1.772946451  | 0.006840268 | 0.005857693 |
| GOBP | GOBP_REGULATION_OF_ESTABLISHMENT_OF_PLANAR_POLARITY                                         | 0.601670561  | 1.860695632  | 0.017240666 | 0.014764117 |
| GOBP | GOBP_REGULATION_OF_COMPLEMENT_ACTIVATION                                                    | 0.742805397  | 1.851353165  | 0.039916314 | 0.034182504 |
| GOBP | GOBP_REGULATION_OF_CHEMOTAXIS                                                               | 0.496239803  | 1.826782618  | 0.000808997 | 0.000692788 |
| GOBP | GOBP_REGULATION_OF_CELLULAR_RESPONSE_TO_GROWTH_FACTOR                                       | 0.41133878   | 1.570536378  | 0.020871514 | 0.01787341  |

## TOR\_STIMULUS

|      |                                                                           |              |              |             |             |
|------|---------------------------------------------------------------------------|--------------|--------------|-------------|-------------|
| GOBP | GOBP_REGULATION_OF_CELLULAR_EXTRAVASATION                                 | 0.647787954  | 1.842648502  | 0.024132505 | 0.020665973 |
| GOBP | GOBP_REGULATION_OF_CELL_SUBSTRATE_ADHESION                                | 0.450261807  | 1.656214162  | 0.013562982 | 0.011614717 |
| GOBP | GOBP_REGULATION_OF_CELL_MATRIX_ADHESION                                   | 0.503862085  | 1.733433182  | 0.020385955 | 0.017457599 |
| GOBP | GOBP_REGULATION_OF_CELL_CELL_ADHESION                                     | 0.428644909  | 1.691578589  | 0.000459146 | 0.000393191 |
| GOBP | GOBP_REGULATION_OF_CELL_ADHESION_MEDIATED_BY_INTEGRIN                     | 0.61553785   | 1.830749329  | 0.032509079 | 0.027839287 |
| GOBP | GOBP_REGULATION_OF_BMP_SIGNALING_PATHWAY                                  | 0.504012479  | 1.69043283   | 0.046838097 | 0.040110003 |
| GOBP | GOBP_REGULATION_OF_APOPTOTIC_SIGNALING_PATHWAY                            | 0.414068651  | 1.599495433  | 0.00776294  | 0.006647827 |
| GOBP | GOBP_REGULATION_OF_ANIMAL_ORGAN_MORPHOGENESIS                             | 0.525160655  | 1.818612569  | 0.004356058 | 0.003730329 |
| GOBP | GOBP_REGIONALIZATION                                                      | 0.443264054  | 1.712273627  | 0.000712006 | 0.000609729 |
| GOBP | GOBP_RECEPTOR_METABOLIC_PROCESS                                           | 0.449314361  | 1.605445235  | 0.030171403 | 0.025837409 |
| GOBP | GOBP_RECEPTOR_MEDIATED_ENDOCYTOSIS                                        | 0.422759527  | 1.58860505   | 0.01382422  | 0.011838429 |
| GOBP | GOBP_PROTEIN_TRANSPORT_ALONG_MICROTUBULE                                  | -0.833091053 | -1.991924178 | 0.026463149 | 0.02266183  |
| GOBP | GOBP_PROTEIN_MONO_ADP_RIBOSYLATION                                        | 0.803918022  | 1.821254163  | 0.047720045 | 0.040865263 |
| GOBP | GOBP_PROTEIN_KINASE_B_SIGNALING                                           | 0.448059694  | 1.625749181  | 0.016550745 | 0.0141733   |
| GOBP | GOBP_POSITIVE_REGULATION_OF_T_CELL_PROLIFERATION                          | 0.502676823  | 1.697179495  | 0.038613879 | 0.033067159 |
| GOBP | GOBP_POSITIVE_REGULATION_OF_SYNAPTIC_TRANSMISSION_GLUTAMATERGIC           | 0.752485703  | 1.991893052  | 0.00948406  | 0.008121715 |
| GOBP | GOBP_POSITIVE_REGULATION_OF_RESPONSE_TO_EXTERNAL_STIMULUS                 | 0.393219265  | 1.547828006  | 0.007970088 | 0.006825219 |
| GOBP | GOBP_POSITIVE_REGULATION_OF_RECEPTOR_MEDIATED_ENDOCYTOSIS                 | 0.587812461  | 1.794477848  | 0.041247433 | 0.035322415 |
| GOBP | GOBP_POSITIVE_REGULATION_OF_NON_CANONICAL_WNT_SIGNALING_PATHWAY           | 0.774912853  | 1.808578947  | 0.045065036 | 0.038591635 |
| GOBP | GOBP_POSITIVE_REGULATION_OF_MONONUCLEAR_CELL_MIGRATION                    | 0.555898046  | 1.748574011  | 0.037847404 | 0.032410785 |
| GOBP | GOBP_POSITIVE_REGULATION_OF_MAPK_CASCADE                                  | 0.392593419  | 1.55512854   | 0.003286043 | 0.002814017 |
| GOBP | GOBP_POSITIVE_REGULATION_OF_MACROPHAGE_MIGRATION                          | 0.755506032  | 1.962144903  | 0.006472144 | 0.005542448 |
| GOBP | GOBP_POSITIVE_REGULATION_OF_MACROPHAGE_CHEMOTAXIS                         | 0.767332049  | 1.861015338  | 0.029353998 | 0.025137421 |
| GOBP | GOBP_POSITIVE_REGULATION_OF_LEUKOCYTE_PROLIFERATION                       | 0.501319894  | 1.786711483  | 0.006173531 | 0.005286729 |
| GOBP | GOBP_POSITIVE_REGULATION_OF_LEUKOCYTE_MIGRATION                           | 0.590957071  | 2.067484937  | 3.13E-05    | 2.68E-05    |
| GOBP | GOBP_POSITIVE_REGULATION_OF_LEUKOCYTE_CHEMOTAXIS                          | 0.574441609  | 1.913249531  | 0.00822631  | 0.007044635 |
| GOBP | GOBP_POSITIVE_REGULATION_OF_LEUKOCYTE_CELL_CELL_ADHESION                  | 0.458368949  | 1.714518937  | 0.005982588 | 0.005123215 |
| GOBP | GOBP_POSITIVE_REGULATION_OF_INFLAMMATORY_RESPONSE_TO_O_ANTIGENIC_STIMULUS | 0.815636522  | 1.749423567  | 0.044651048 | 0.038237115 |
| GOBP | GOBP_POSITIVE_REGULATION_OF_IMMUNE_RESPONSE                               | 0.410566433  | 1.635997587  | 0.000509518 | 0.000436328 |
| GOBP | GOBP_POSITIVE_REGULATION_OF_FOCAL_ADHESION_ASSEMBLY                       | 0.68407435   | 1.798890707  | 0.049174336 | 0.042110651 |
| GOBP | GOBP_POSITIVE_REGULATION_OF_EXTRINSIC_APOPTOTIC_SIGNALING_PATHWAY         | 0.613473834  | 1.836209692  | 0.017801745 | 0.0152446   |
| GOBP | GOBP_POSITIVE_REGULATION_OF_ERK1_AND_ERK2_CASCADE                         | 0.465692819  | 1.699575852  | 0.006695818 | 0.005733992 |
| GOBP | GOBP_POSITIVE_REGULATION_OF_DNA_BINDING_TRANSCRIPTION_FACTOR_ACTIVITY     | 0.398564529  | 1.510984818  | 0.036682758 | 0.031413435 |
| GOBP | GOBP_POSITIVE_REGULATION_OF_CYTOKINE_PRODUCTION                           | 0.376414465  | 1.491708674  | 0.013260009 | 0.011355265 |
| GOBP | GOBP_POSITIVE_REGULATION_OF_CHEMOTAXIS                                    | 0.586393708  | 2.052331895  | 5.11E-05    | 4.38E-05    |
| GOBP | GOBP_POSITIVE_REGULATION_OF_CELL_SUBSTRATE_JUNCTION_ORGANIZATION          | 0.651458431  | 1.771348859  | 0.040129438 | 0.034365014 |
| GOBP | GOBP_POSITIVE_REGULATION_OF_CELL_MATRIX_ADHESION                          | 0.588770106  | 1.802688955  | 0.027911095 | 0.023901785 |

|      |                                                                                                      |              |              |             |             |
|------|------------------------------------------------------------------------------------------------------|--------------|--------------|-------------|-------------|
| GOBP | GOBP_POSITIVE_REGULATION_OF_CELL_CELL_ADHESION                                                       | 0.46884814   | 1.790113392  | 0.000540691 | 0.000463023 |
| GOBP | GOBP_POSITIVE_REGULATION_OF_CELL_ADHESION                                                            | 0.445393194  | 1.757622052  | 3.95E-05    | 3.38E-05    |
| GOBP | GOBP_POSITIVE_REGULATION_OF_CELL_ACTIVATION                                                          | 0.451573862  | 1.74293299   | 0.000563004 | 0.000482131 |
| GOBP | GOBP_POSITIVE_REGULATION_OF_APOPTOTIC_SIGNALING_PATHWAY                                              | 0.473886416  | 1.619439265  | 0.034493283 | 0.029538469 |
| GOBP | GOBP_PLASMINOGEN_ACTIVATION                                                                          | 0.713983576  | 1.823410157  | 0.044651048 | 0.038237115 |
| GOBP | GOBP_PITUITARY_GLAND_DEVELOPMENT                                                                     | 0.71210803   | 2.060819049  | 0.001479119 | 0.00126665  |
| GOBP | GOBP_PHAGOCYTOSIS                                                                                    | 0.441841615  | 1.645875886  | 0.011496205 | 0.009844824 |
| GOBP | GOBP_PERIPHERAL_NERVOUS_SYSTEM_NEURON_DIFFERENTIATION                                                | 0.812204318  | 1.84002654   | 0.040129438 | 0.034365014 |
| GOBP | GOBP_PEPTIDE_ANTIGEN_ASSEMBLY_WITH_MHC_CLASS_II_PROTEIN_COMPLEX                                      | 0.857846404  | 1.94342743   | 0.013795007 | 0.011813413 |
| GOBP | GOBP_PATTERN_SPECIFICATION_PROCESS                                                                   | 0.405700309  | 1.601115823  | 0.002461716 | 0.002108101 |
| GOBP | GOBP_PATHWAY_RESTRICTED_SMAD_PROTEIN_PHOSPHORYLATION                                                 | 0.60716515   | 1.881174581  | 0.011244138 | 0.009628965 |
| GOBP | GOBP_OSTEOBLAST_PROLIFERATION                                                                        | 0.730798546  | 1.977109125  | 0.010959273 | 0.00938502  |
| GOBP | GOBP_OSTEOBLAST_DIFFERENTIATION                                                                      | 0.413846195  | 1.529023843  | 0.047720045 | 0.040865263 |
| GOBP | GOBP_OSSIFICATION                                                                                    | 0.411219373  | 1.61187223   | 0.001774476 | 0.00151958  |
| GOBP | GOBP_ORGANIC_HYDROXY_COMPOUND_CATABOLIC_PROCESS                                                      | -0.583268063 | -1.97589202  | 0.002945728 | 0.002522586 |
| GOBP | GOBP_ORGANIC_HYDROXY_COMPOUND_BIOSYNTHETIC_PROCESS                                                   | -0.381255014 | -1.515487147 | 0.029353998 | 0.025137421 |
| GOBP | GOBP_ODONTOGENESIS                                                                                   | 0.538471598  | 1.864851368  | 0.00279392  | 0.002392585 |
| GOBP | GOBP_NOREPINEPHRINE_METABOLIC_PROCESS                                                                | -0.818058304 | -1.955980811 | 0.043057617 | 0.036872573 |
| GOBP | GOBP_NON_CANONICAL_WNT_SIGNALING_PATHWAY                                                             | 0.620909921  | 1.992974501  | 0.003639945 | 0.003117082 |
| GOBP | GOBP_NEUTROPHIL_MIGRATION                                                                            | 0.616255637  | 2.107621242  | 5.11E-05    | 4.38E-05    |
| GOBP | GOBP_NEUTROPHIL_CHEMOTAXIS                                                                           | 0.64450376   | 2.161633612  | 6.75E-05    | 5.78E-05    |
| GOBP | GOBP_NEURON_REMODELING                                                                               | 0.809167289  | 1.873972815  | 0.045320712 | 0.038810584 |
| GOBP | GOBP_NEURON_FATE_COMMITMENT                                                                          | 0.642732611  | 2.0027726    | 0.00210247  | 0.00180046  |
| GOBP | GOBP_NEURON_DEATH                                                                                    | 0.401594073  | 1.549440482  | 0.014967295 | 0.012817306 |
| GOBP | GOBP_NEURAL_CREST_CELL_MIGRATION                                                                     | 0.555862957  | 1.732084355  | 0.043057617 | 0.036872573 |
| GOBP | GOBP_NEURAL_CREST_CELL_DIFFERENTIATION                                                               | 0.4959066    | 1.665147165  | 0.043057617 | 0.036872573 |
| GOBP | GOBP_NEPHRON_DEVELOPMENT                                                                             | 0.46823029   | 1.661845885  | 0.022719048 | 0.019455554 |
| GOBP | GOBP_NEGATIVE_REGULATION_OF_WNT_SIGNALING_PATHWAY                                                    | 0.460366756  | 1.648406781  | 0.024780963 | 0.021221283 |
| GOBP | GOBP_NEGATIVE_REGULATION_OF_VIRAL_GENOME_REPLICATION                                                 | 0.616125233  | 1.870061904  | 0.01466115  | 0.012555138 |
| GOBP | GOBP_NEGATIVE_REGULATION_OF_TRANSMEMBRANE_RECEPTOR_PROTEIN_SERINE_THREONINE_KINASE_SIGNALING_PATHWAY | 0.502827223  | 1.719691102  | 0.024015333 | 0.020565632 |
| GOBP | GOBP_NEGATIVE_REGULATION_OF_RESPONSE_TO_EXTERNAL_STIMULUS                                            | 0.398050793  | 1.551910464  | 0.014408348 | 0.01233865  |
| GOBP | GOBP_NEGATIVE_REGULATION_OF_RESPONSE_TO_BIOTIC_STIMULUS                                              | 0.51474511   | 1.750541832  | 0.018371357 | 0.01573239  |
| GOBP | GOBP_NEGATIVE_REGULATION_OF_PEPTIDASE_ACTIVITY                                                       | 0.419455191  | 1.56866841   | 0.034635675 | 0.029660407 |
| GOBP | GOBP_NEGATIVE_REGULATION_OF_PATHWAY_RESTRICTED_SMAD_PROTEIN_PHOSPHORYLATION                          | 0.824233407  | 1.81001741   | 0.047187271 | 0.04040902  |
| GOBP | GOBP_NEGATIVE_REGULATION_OF_OSTEOBLAST_DIFFERENTIATION                                               | 0.613626028  | 1.793201613  | 0.036179231 | 0.030982238 |
| GOBP | GOBP_NEGATIVE_REGULATION_OF_LYMPHOCYTE_ACTIVATION                                                    | 0.453597382  | 1.609910674  | 0.040129438 | 0.034365014 |
| GOBP | GOBP_NEGATIVE_REGULATION_OF_LOCOMOTION                                                               | 0.417784137  | 1.608184674  | 0.009090459 | 0.007784653 |
| GOBP | GOBP_NEGATIVE_REGULATION_OF_LEUKOCYTE_MIGRATION                                                      | 0.647524433  | 1.892263047  | 0.01685455  | 0.014433466 |
| GOBP | GOBP_NEGATIVE_REGULATION_OF_LEUKOCYTE_CELL_CELL_ADHESION                                             | 0.475359132  | 1.645988919  | 0.03347091  | 0.028662956 |



## HESION

|      |                                                                         |              |              |             |             |
|------|-------------------------------------------------------------------------|--------------|--------------|-------------|-------------|
| GOBP | GOBP_NEGATIVE_REGULATION_OF_IMMUNE_SYSTEM_PROCESS                       | 0.476185692  | 1.865068956  | 4.16E-06    | 3.56E-06    |
| GOBP | GOBP_NEGATIVE_REGULATION_OF_HYDROLASE_ACTIVITY                          | 0.404353228  | 1.557541897  | 0.014408348 | 0.01233865  |
| GOBP | GOBP_NEGATIVE_REGULATION_OF_GROWTH                                      | 0.421492953  | 1.577081307  | 0.018371357 | 0.01573239  |
| GOBP | GOBP_NEGATIVE_REGULATION_OF_ENDOTHELIAL_CELL_PROLIFERATION              | 0.64586444   | 1.837177022  | 0.026358236 | 0.022571987 |
| GOBP | GOBP_NEGATIVE_REGULATION_OF_CELLULAR_RESPONSE_TO_GROWTH_FACTOR_STIMULUS | 0.523568622  | 1.746901149  | 0.043884661 | 0.037580815 |
| GOBP | GOBP_NEGATIVE_REGULATION_OF_CELL_DIVISION                               | -0.79465349  | -1.994866802 | 0.008391048 | 0.007185709 |
| GOBP | GOBP_NEGATIVE_REGULATION_OF_CELL_CELL_ADHESION                          | 0.433971199  | 1.564129558  | 0.030990705 | 0.026539021 |
| GOBP | GOBP_NEGATIVE_REGULATION_OF_CELL_ADHESION                               | 0.433875174  | 1.652096088  | 0.005565359 | 0.004765919 |
| GOBP | GOBP_NEGATIVE_REGULATION_OF_CELL_ACTIVATION                             | 0.435495186  | 1.592652988  | 0.034383662 | 0.029444595 |
| GOBP | GOBP_NEGATIVE_REGULATION_OF_CANONICAL_WNT_SIGNALING_PATHWAY             | 0.458656918  | 1.591612833  | 0.047549951 | 0.040719602 |
| GOBP | GOBP_NEGATIVE_REGULATION_OF_BMP_SIGNALING_PATHWAY                       | 0.574339546  | 1.743234082  | 0.041858618 | 0.035845805 |
| GOBP | GOBP_MYELOID_LEUKOCYTE_MIGRATION                                        | 0.586242393  | 2.164206072  | 9.56E-08    | 8.19E-08    |
| GOBP | GOBP_MYELOID_LEUKOCYTE_DIFFERENTIATION                                  | 0.432254758  | 1.593069982  | 0.034577683 | 0.029610746 |
| GOBP | GOBP_MYELOID_LEUKOCYTE_ACTIVATION                                       | 0.458582527  | 1.702440795  | 0.006294377 | 0.005390216 |
| GOBP | GOBP_MYELOID_CELL_DIFFERENTIATION                                       | 0.374186765  | 1.455978869  | 0.041874084 | 0.03585905  |
| GOBP | GOBP_MUSCLE_CELL_MIGRATION                                              | 0.606097415  | 1.975305491  | 0.003284878 | 0.002813019 |
| GOBP | GOBP_MORPHOGENESIS_OF_AN_EPITHELIUM                                     | 0.424521754  | 1.695553545  | 0.000111717 | 9.57E-05    |
| GOBP | GOBP_MORPHOGENESIS_OF_A_BRANCHING_STRUCTURE                             | 0.486109799  | 1.777756101  | 0.002461716 | 0.002108101 |
| GOBP | GOBP_MONONUCLEAR_CELL_MIGRATION                                         | 0.527305616  | 1.911222451  | 0.000409542 | 0.000350713 |
| GOBP | GOBP_MONOCYTE_CHEMOTAXIS                                                | 0.65473314   | 2.028554074  | 0.00213662  | 0.001829704 |
| GOBP | GOBP_MOLTING_CYCLE                                                      | 0.560186271  | 1.916744     | 0.002978783 | 0.002550893 |
| GOBP | GOBP_MITOCHONDRIAL_RESPIRATORY_CHAIN_COMPLEX_ASSEMBLY                   | 0.528996154  | 1.724028152  | 0.043363216 | 0.037134274 |
| GOBP | GOBP_MESONEPHROS_DEVELOPMENT                                            | 0.532767436  | 1.798773936  | 0.014408348 | 0.01233865  |
| GOBP | GOBP_MESENCHYME_DEVELOPMENT                                             | 0.405174727  | 1.554320978  | 0.016948299 | 0.014513748 |
| GOBP | GOBP_MESENCHYMAL_CELL_DIFFERENTIATION                                   | 0.429871154  | 1.607923562  | 0.018599533 | 0.015927789 |
| GOBP | GOBP_MEMBRANE_LIPID_METABOLIC_PROCESS                                   | -0.449203506 | -1.754803474 | 0.003610783 | 0.003092109 |
| GOBP | GOBP_MEMBRANE_LIPID_BIOSYNTHETIC_PROCESS                                | -0.46324577  | -1.738417808 | 0.016406054 | 0.014049394 |
| GOBP | GOBP_MACROPHAGE_MIGRATION                                               | 0.664752364  | 2.002402384  | 0.00593883  | 0.005085742 |
| GOBP | GOBP_MACROPHAGE_CHEMOTAXIS                                              | 0.655476704  | 1.81488579   | 0.035354948 | 0.030276359 |
| GOBP | GOBP_MACROAUTOPHAGY                                                     | -0.368084655 | -1.499282223 | 0.024015333 | 0.020565632 |
| GOBP | GOBP_LYMPHOCYTE_MIGRATION                                               | 0.50073729   | 1.699398862  | 0.032394299 | 0.027740995 |
| GOBP | GOBP_LYMPHOCYTE_MEDIATED_IMMUNITY                                       | 0.44246676   | 1.688852488  | 0.005867476 | 0.005024638 |
| GOBP | GOBP_LYMPHOCYTE_COSTIMULATION                                           | 0.59958434   | 1.775001703  | 0.040690319 | 0.034845328 |
| GOBP | GOBP_LYMPHOCYTE_CHEMOTAXIS                                              | 0.600687927  | 1.833784159  | 0.029353998 | 0.025137421 |
| GOBP | GOBP_LIPOPOLYSACCHARIDE_MEDIATED_SIGNALING_PATHWAY                      | 0.547800535  | 1.6972457    | 0.047720045 | 0.040865263 |
| GOBP | GOBP_LEUKOCYTE_TETHERING_OR_ROLLING                                     | 0.657275378  | 1.807859356  | 0.046380297 | 0.039717964 |
| GOBP | GOBP_LEUKOCYTE_PROLIFERATION                                            | 0.449492864  | 1.73692827   | 0.000871319 | 0.000746158 |
| GOBP | GOBP_LEUKOCYTE_MIGRATION                                                | 0.516892453  | 2.009472568  | 9.56E-08    | 8.19E-08    |
| GOBP | GOBP_LEUKOCYTE_MEDIATED_IMMUNITY                                        | 0.417076594  | 1.626087781  | 0.003639945 | 0.003117082 |
| GOBP | GOBP_LEUKOCYTE_CHEMOTAXIS                                               | 0.562994048  | 2.086325084  | 1.99E-06    | 1.70E-06    |
| GOBP | GOBP_LEUKOCYTE_CELL_CELL_ADHESION                                       | 0.451529139  | 1.75367751   | 0.000323593 | 0.00027711  |
| GOBP | GOBP_KIDNEY_EPITHELIUM_DEVELOPMENT                                      | 0.451418084  | 1.591747972  | 0.036977984 | 0.031666254 |
| GOBP | GOBP_INTERMEDIATE_FILAMENT_ORGANIZATION                                 | 0.733942764  | 2.087717945  | 0.000720891 | 0.000617338 |
| GOBP | GOBP_INTERMEDIATE_FILAMENT_BASED_PROCESS                                | 0.63246212   | 1.989405853  | 0.003284878 | 0.002813019 |

|      |                                                                     |              |              |             |             |
|------|---------------------------------------------------------------------|--------------|--------------|-------------|-------------|
| GOBP | GOBP_INTEGRIN_MEDIATED_SIGNALING_PATHWAY                            | 0.547263413  | 1.862023761  | 0.005350461 | 0.00458189  |
| GOBP | GOBP_INSULIN_LIKE_GROWTH_FACTOR_RECEPTOR_SIGNALING_PATHWAY          | 0.769399516  | 2.1303156    | 0.000540691 | 0.000463023 |
| GOBP | GOBP_INNER_EAR_MORPHOGENESIS                                        | -0.467138177 | -1.660818179 | 0.036254387 | 0.031046598 |
| GOBP | GOBP_IMMUNOGLOBULIN_PRODUCTION                                      | 0.493356795  | 1.696977221  | 0.042652752 | 0.036525866 |
| GOBP | GOBP_IMMUNE_RESPONSE_REGULATING_SIGNALING_PATHWAY                   | 0.367014206  | 1.441831069  | 0.038630356 | 0.033081269 |
| GOBP | GOBP_HUMORAL_IMMUNE_RESPONSE_MEDIATED_BY_CIRCULATING_IMMUNOGLOBULIN | 0.678098963  | 2.057843704  | 0.001796129 | 0.001538123 |
| GOBP | GOBP_HUMORAL_IMMUNE_RESPONSE                                        | 0.470192069  | 1.755874716  | 0.001700387 | 0.001456133 |
| GOBP | GOBP_HETEROTYPIC_CELL_CELL_ADHESION                                 | 0.633837733  | 1.975055915  | 0.003070741 | 0.002629642 |
| GOBP | GOBP_HEMOSTASIS                                                     | 0.410888778  | 1.523511918  | 0.043946482 | 0.037633756 |
| GOBP | GOBP_HEART_MORPHOGENESIS                                            | 0.407450601  | 1.531078643  | 0.031101076 | 0.026633539 |
| GOBP | GOBP GRANULOCYTE MIGRATION                                          | 0.608409982  | 2.15236236   | 2.64E-06    | 2.26E-06    |
| GOBP | GOBP GRANULOCYTE CHEMOTAXIS                                         | 0.637053629  | 2.182692781  | 1.49E-05    | 1.27E-05    |
| GOBP | GOBP GRANULOCYTE ACTIVATION                                         | 0.617142225  | 1.807657195  | 0.036001335 | 0.030829896 |
| GOBP | GOBP GLYCOPROTEIN METABOLIC PROCESS                                 | 0.38939487   | 1.509812815  | 0.016351122 | 0.014002353 |
| GOBP | GOBP_GLIOGENESIS                                                    | 0.42861509   | 1.642302106  | 0.009930124 | 0.008503704 |
| GOBP | GOBP_GLIAL_CELL_FATE_COMMITMENT                                     | 0.826970392  | 1.873478673  | 0.030990705 | 0.026539021 |
| GOBP | GOBP_GLIAL_CELL_DIFFERENTIATION                                     | 0.417032793  | 1.539542199  | 0.036001335 | 0.030829896 |
| GOBP | GOBP_GASTRULATION                                                   | 0.472288852  | 1.699300178  | 0.009090459 | 0.007784653 |
| GOBP | GOBP_GABAERGIC_NEURON_DIFFERENTIATION                               | 0.823559075  | 1.865750428  | 0.031639951 | 0.027095006 |
| GOBP | GOBP_FORMATION_OF_PRIMARY_GERM_LAYER                                | 0.502302555  | 1.726163312  | 0.030990705 | 0.026539021 |
| GOBP | GOBP_EYE_MORPHOGENESIS                                              | 0.461687104  | 1.645459634  | 0.029357196 | 0.025140159 |
| GOBP | GOBP_EXTRINSIC_APOPTOTIC_SIGNALING_PATHWAY                          | 0.444249414  | 1.640016639  | 0.009501727 | 0.008136845 |
| GOBP | GOBP_EXTRACELLULAR_MATRIX_DISASSEMBLY                               | 0.576199027  | 1.787764162  | 0.042690012 | 0.036557773 |
| GOBP | GOBP_EXTERNAL_ENCAPSULATING_STRUCTURE_ORGANIZATION                  | 0.544513356  | 2.09380016   | 9.56E-08    | 8.19E-08    |
| GOBP | GOBP_EXOCRINE_SYSTEM_DEVELOPMENT                                    | 0.641696981  | 1.89967142   | 0.01466115  | 0.012555138 |
| GOBP | GOBP_ESTABLISHMENT_OF_TISSUE_POLARITY                               | 0.596236352  | 1.921198289  | 0.00776294  | 0.006647827 |
| GOBP | GOBP_EPIDERMIS_DEVELOPMENT                                          | 0.386075817  | 1.483938486  | 0.030990705 | 0.026539021 |
| GOBP | GOBP_EOSINOPHIL_MIGRATION                                           | 0.825764598  | 2.091921816  | 0.001845475 | 0.001580381 |
| GOBP | GOBP_EOSINOPHIL_CHEMOTAXIS                                          | 0.865355999  | 2.092418033  | 0.000563004 | 0.000482131 |
| GOBP | GOBP_ENTRY_INTO_HOST                                                | 0.456373265  | 1.619461777  | 0.032394299 | 0.027740995 |
| GOBP | GOBP_ENDOTHELIAL_CELL_MIGRATION                                     | 0.427187159  | 1.570258083  | 0.023203461 | 0.019870382 |
| GOBP | GOBP_ENDOMEMBRANE_SYSTEM_ORGANIZATION                               | -0.319772223 | -1.368450467 | 0.036682758 | 0.031413435 |
| GOBP | GOBP_ENDODERMAL_CELL_DIFFERENTIATION                                | 0.658374496  | 1.923970227  | 0.013562982 | 0.011614717 |
| GOBP | GOBP_ENDODERM_FORMATION                                             | 0.578563361  | 1.75578055   | 0.040129438 | 0.034365014 |
| GOBP | GOBP_ENDODERM_DEVELOPMENT                                           | 0.552396525  | 1.794364598  | 0.01930075  | 0.016528279 |
| GOBP | GOBP_ENDOCRINE_SYSTEM_DEVELOPMENT                                   | 0.474620912  | 1.647010445  | 0.026861021 | 0.023002549 |
| GOBP | GOBP_EMBRYONIC_SKELETAL_SYSTEM_DEVELOPMENT                          | 0.494990455  | 1.712726408  | 0.018081518 | 0.015484185 |
| GOBP | GOBP_EMBRYONIC_ORGAN_DEVELOPMENT                                    | 0.375686937  | 1.486681311  | 0.01030618  | 0.008825741 |
| GOBP | GOBP_EMBRYONIC_EYE_MORPHOGENESIS                                    | 0.659030197  | 1.824724712  | 0.031472689 | 0.026951771 |
| GOBP | GOBP_DIVALENT_INORGANIC_CATION_HOMEOSTASIS                          | 0.370087527  | 1.469504117  | 0.014408348 | 0.01233865  |
| GOBP | GOBP_DIENCEPHALON_DEVELOPMENT                                       | 0.646337801  | 2.097414588  | 0.000696327 | 0.000596303 |
| GOBP | GOBP_DENDRITIC_CELL_MIGRATION                                       | 0.729450305  | 2.006379066  | 0.006976342 | 0.00597422  |
| GOBP | GOBP_DENDRITIC_CELL_CHEMOTAXIS                                      | 0.761112518  | 2.001475768  | 0.00442183  | 0.003786652 |
| GOBP | GOBP_DENDRITIC_CELL_ANTIGEN_PROCESSING_AND_PRESENTATION             | 0.805611343  | 1.825090336  | 0.046149197 | 0.03952006  |
| GOBP | GOBP_DEFENSE_RESPONSE_TO_SYMBIONT                                   | 0.462157575  | 1.754703062  | 0.001732518 | 0.001483649 |
| GOBP | GOBP_CYTOLYSIS                                                      | 0.720563787  | 1.871395466  | 0.01685455  | 0.014433466 |

|      |                                                                                        |              |              |             |             |
|------|----------------------------------------------------------------------------------------|--------------|--------------|-------------|-------------|
| GOBP | GOBP_CYTOKINE_MEDIATED_SIGNALING_PATHWAY                                               | 0.429876788  | 1.704006833  | 0.00010469  | 8.97E-05    |
| GOBP | GOBP_CONNECTIVE_TISSUE_DEVELOPMENT                                                     | 0.437101322  | 1.642497268  | 0.006173531 | 0.005286729 |
| GOBP | GOBP_COMPLEMENT_ACTIVATION_ALTERNATIVE_PATHWAY                                         | 0.799308023  | 1.909640004  | 0.021211338 | 0.018164419 |
| GOBP | GOBP_COMPLEMENT_ACTIVATION                                                             | 0.704296027  | 2.206573293  | 5.11E-05    | 4.38E-05    |
| GOBP | GOBP_COLLAGEN_METABOLIC_PROCESS                                                        | 0.517138525  | 1.703692527  | 0.03677105  | 0.031489045 |
| GOBP | GOBP_CHRONIC_INFLAMMATORY_RESPONSE                                                     | 0.810945827  | 1.96085504   | 0.008507796 | 0.007285687 |
| GOBP | GOBP_CEREBRAL_CORTEX_GABAERGIC_INTERNEURON_DIFFERENTIATION                             | 0.8507732    | 1.82478671   | 0.015412273 | 0.013198365 |
| GOBP | GOBP_CELLULAR_RESPONSE_TO_INTERLEUKIN_1                                                | 0.526337652  | 1.76972025   | 0.024955753 | 0.021370965 |
| GOBP | GOBP_CELLULAR_RESPONSE_TO_INTERFERON_GAMMA                                             | 0.569849164  | 1.935058061  | 0.00210247  | 0.00180046  |
| GOBP | GOBP_CELLULAR_EXTRAVASATION                                                            | 0.629334213  | 2.032734876  | 0.001700387 | 0.001456133 |
| GOBP | GOBP_CELL_SUBSTRATE_JUNCTION_ORGANIZATION                                              | 0.536809902  | 1.805162135  | 0.013562982 | 0.011614717 |
| GOBP | GOBP_CELL_SUBSTRATE_ADHESION                                                           | 0.474416214  | 1.832802486  | 3.13E-05    | 2.68E-05    |
| GOBP | GOBP_CELL_RECOGNITION                                                                  | 0.475084816  | 1.696646893  | 0.013576746 | 0.011626504 |
| GOBP | GOBP_CELL_MATRIX_ADHESION                                                              | 0.516696706  | 1.918510691  | 0.000114867 | 9.84E-05    |
| GOBP | GOBP_CELL_GROWTH                                                                       | 0.365355398  | 1.448420126  | 0.02668864  | 0.02285493  |
| GOBP | GOBP_CELL_FATE_SPECIFICATION                                                           | 0.566066577  | 1.888696749  | 0.011675346 | 0.009998232 |
| GOBP | GOBP_CELL_FATE_COMMITMENT                                                              | 0.460870219  | 1.74551741   | 0.002086808 | 0.001787047 |
| GOBP | GOBP_CELL_CHEMOTAXIS                                                                   | 0.53499782   | 2.051572443  | 1.64E-07    | 1.40E-07    |
| GOBP | GOBP_CELL_ADHESION_MEDIATED_BY_INTEGRIN                                                | 0.629773842  | 2.059206364  | 0.000928868 | 0.00079544  |
| GOBP | GOBP_CARTILAGE_DEVELOPMENT                                                             | 0.470558196  | 1.698119568  | 0.01021893  | 0.008751024 |
| GOBP | GOBP_CARDIOCYTE_DIFFERENTIATION                                                        | 0.46218534   | 1.617213969  | 0.045398035 | 0.0388768   |
| GOBP | GOBP_CARDIAC_NEURAL_CREST_CELL_MIGRATION_INVOLVED_IN_OUTFLOW_TRACT_MORPHOGENESIS       | 0.862951767  | 1.895042969  | 0.021147353 | 0.018109625 |
| GOBP | GOBP_CARDIAC_NEURAL_CREST_CELL_DEVELOPMENT_INVOLVED_IN_OUTFLOW_TRACT_MORPHOGENESIS     | 0.841072651  | 1.947863323  | 0.021450315 | 0.018369068 |
| GOBP | GOBP_CAMERA_TYPE_EYE_MORPHOGENESIS                                                     | 0.484249464  | 1.661255113  | 0.029522433 | 0.025281661 |
| GOBP | GOBP_CALCIIUM_ION_EXPORT                                                               | -0.842789701 | -1.895447544 | 0.019359195 | 0.016578329 |
| GOBP | GOBP_BRANCHING_MORPHOGENESIS_OF_AN_EPITHELIAL_TUBE                                     | 0.484374591  | 1.723766322  | 0.008516923 | 0.007293503 |
| GOBP | GOBP_BONE_DEVELOPMENT                                                                  | 0.460336593  | 1.692341546  | 0.009930124 | 0.008503704 |
| GOBP | GOBP_BILE_ACID_METABOLIC_PROCESS                                                       | -0.649104415 | -2.015118358 | 0.004356058 | 0.003730329 |
| GOBP | GOBP_BILE_ACID_BIOSYNTHETIC_PROCESS                                                    | -0.670381382 | -1.970440885 | 0.019151823 | 0.016400745 |
| GOBP | GOBP_BASEMENT_MEMBRANE_ORGANIZATION                                                    | 0.746621732  | 2.01991732   | 0.006173531 | 0.005286729 |
| GOBP | GOBP_B_CELL_MEDIATED_IMMUNITY                                                          | 0.585079397  | 2.047731912  | 5.28E-05    | 4.52E-05    |
| GOBP | GOBP_ATP_SYNTHESIS_COUPLED_ELECTRON_TRANSPORT                                          | 0.574191957  | 1.827515636  | 0.021947629 | 0.018794945 |
| GOBP | GOBP_APOPTOTIC_CELL_CLEARANCE                                                          | 0.606036379  | 1.794102239  | 0.035700308 | 0.03057211  |
| GOBP | GOBP_ANTIGEN_PROCESSING_AND_PRESENTATION_OF_EXOGENOUS_PEPTIDE_ANTIGEN_VIA_MHC_CLASS_II | 0.69100334   | 1.799525374  | 0.045065036 | 0.038591635 |
| GOBP | GOBP_ANTIGEN_PROCESSING_AND_PRESENTATION_OF_EXOGENOUS_ANTIGEN                          | 0.611472518  | 1.777711491  | 0.047017588 | 0.040263711 |
| GOBP | GOBP_ANTIGEN_PROCESSING_AND_PRESENTATION                                               | 0.506468164  | 1.698669075  | 0.043057617 | 0.036872573 |
| GOBP | GOBP_ANTERIOR_POSTERIOR_PATTERN_SPECIFICATION                                          | 0.442054306  | 1.627268452  | 0.019359195 | 0.016578329 |
| GOBP | GOBP_AMMONIUM_ION_METABOLIC_PROCESS                                                    | -0.709857407 | -1.923874885 | 0.047187271 | 0.04040902  |
| GOBP | GOBP_AMEBOIDAL_TYPE_CELL_MIGRATION                                                     | 0.426785905  | 1.679956285  | 0.000509518 | 0.000436328 |
| GOBP | GOBP_ALCOHOL_METABOLIC_PROCESS                                                         | -0.371527907 | -1.547214612 | 0.005982588 | 0.005123215 |
| GOBP | GOBP_ALCOHOL_CATABOLIC_PROCESS                                                         | -0.581056029 | -1.849021844 | 0.023351546 | 0.019997196 |
| GOBP | GOBP_AGING                                                                             | 0.462738243  | 1.778337256  | 0.000509518 | 0.000436328 |
| GOBP | GOBP_ADENOHYPOPHYSIS_DEVELOPMENT                                                       | 0.777244317  | 1.814020379  | 0.043057617 | 0.036872573 |
| GOBP | GOBP_ADAPTIVE_IMMUNE_RESPONSE_BASED_ON_SOMATIC_RECOGNITION                             | 0.441924925  | 1.694662974  | 0.002256712 | 0.001932545 |

OMBINATION\_OF\_IMMUNE\_RECEPTORS\_BUILT\_FROM\_IMMUNOGL

OBULIN\_SUPERFAMILY\_DOMAINS

|      |                                    |             |             |             |             |
|------|------------------------------------|-------------|-------------|-------------|-------------|
| GOBP | GOBP_ADAPTIVE_IMMUNE_RESPONSE      | 0.417806101 | 1.64901019  | 0.000509518 | 0.000436328 |
| GOBP | GOBP_ACTIVATION_OF_IMMUNE_RESPONSE | 0.453781173 | 1.747335323 | 0.001153151 | 0.000987506 |

---

**Supplementary Table 3 GSEA results based on KEGG pathway gene sets**

| ID                                                | enrichmentScore | NES          | p.adjust    | qvalue      |
|---------------------------------------------------|-----------------|--------------|-------------|-------------|
| KEGG_CYTOKINE_CYTOKINE_RECEPTOR_INTERACTION       | 0.521744781     | 1.968418821  | 4.65E-06    | 3.78E-06    |
| KEGG_INTESTINAL_IMMUNE_NETWORK_FOR_IGA_PRODUCTION | 0.762576227     | 2.206015889  | 1.98E-05    | 1.61E-05    |
| KEGG_FOCAL_ADHESION                               | 0.534724135     | 1.969654011  | 1.98E-05    | 1.61E-05    |
| KEGG_CHEMOKINE_SIGNALING_PATHWAY                  | 0.519461279     | 1.8920852    | 9.68E-05    | 7.86E-05    |
| KEGG_SYSTEMIC_LUPUS_ERYTHEMATOSUS                 | 0.696330296     | 2.055146103  | 0.000105409 | 8.56E-05    |
| KEGG_CELL_ADHESION_MOLECULES_CAMS                 | 0.562730589     | 1.935737794  | 0.00015256  | 0.000123933 |
| KEGG_PATHWAYS_IN_CANCER                           | 0.425399753     | 1.642194258  | 0.000669387 | 0.000543781 |
| KEGG_ECM_RECEPTOR_INTERACTION                     | 0.602705959     | 1.946666098  | 0.000811504 | 0.000659231 |
| KEGG_COMPLEMENT_AND_COAGULATION_CASCADES          | 0.643182979     | 2.030468345  | 0.001070432 | 0.000869573 |
| KEGG_LEISHMANIA_INFECTION                         | 0.62036107      | 1.95842172   | 0.003353335 | 0.002724105 |
| KEGG_HEMATOPOIETIC_CELL_LINEAGE                   | 0.55889503      | 1.81400437   | 0.003353335 | 0.002724105 |
| KEGG_ASTHMA                                       | 0.737312133     | 1.940058126  | 0.00551249  | 0.00447811  |
| KEGG_TGF_BETA_SIGNALING_PATHWAY                   | 0.562233447     | 1.815944861  | 0.005835911 | 0.004740843 |
| KEGG_SMALL_CELL_LUNG_CANCER                       | 0.549150629     | 1.783526253  | 0.007383855 | 0.005998326 |
| KEGG_HEDGEHOG_SIGNALING_PATHWAY                   | 0.599598933     | 1.778595257  | 0.011893146 | 0.00966148  |
| KEGG_TOLL_LIKE_RECEPTOR_SIGNALING_PATHWAY         | 0.522827493     | 1.74081779   | 0.01360693  | 0.011053684 |
| KEGG_ALLOGRAFT_REJECTION                          | 0.673703742     | 1.82363843   | 0.017044038 | 0.013845843 |
| KEGG_HISTIDINE_METABOLISM                         | -0.657846191    | -1.851004218 | 0.02089219  | 0.016971917 |
| KEGG_DNA_REPLICATION                              | 0.640149707     | 1.770535695  | 0.02089219  | 0.016971917 |
| KEGG_LEUKOCYTE_TRANSENDOTHELIAL_MIGRATION         | 0.473823455     | 1.617449584  | 0.022523315 | 0.018296972 |
| KEGG_PRIMARY_BILE_ACID_BIOSYNTHESIS               | -0.744548264    | -1.849881615 | 0.025365815 | 0.020606097 |
| KEGG_SPHINGOLIPID_METABOLISM                      | -0.636474696    | -1.830264539 | 0.027782345 | 0.022569182 |
| KEGG_P53_SIGNALING_PATHWAY                        | 0.53550295      | 1.67811785   | 0.030012429 | 0.024380806 |
| KEGG_APOPTOSIS                                    | 0.496610026     | 1.615407091  | 0.032308455 | 0.026245999 |
| KEGG_TYPE_I_DIABETES_MELLITUS                     | 0.601546415     | 1.700881195  | 0.043621993 | 0.03543663  |
| KEGG_MATURITY_ONSET_DIABETES_OF_THE_YOUNG         | 0.683874799     | 1.760882983  | 0.047167716 | 0.038317023 |
| KEGG_AUTOIMMUNE_THYROID_DISEASE                   | 0.563702328     | 1.645277192  | 0.04964249  | 0.040327423 |

**Supplementary Table 4 List of hub genes in the ME pink module**

| No. | gene names | No. | gene names |
|-----|------------|-----|------------|
| 1   | ATP2C2     | 19  | CHMP4C     |
| 2   | TCEAL8     | 20  | PCDH7      |
| 3   | THRB       | 21  | PLAGL1     |
| 4   | GGT6       | 22  | UBE2E2     |
| 5   | FAM171B    | 23  | NGFRAP1    |
| 6   | ATP13A4    | 24  | WBP5       |
| 7   | C5orf30    | 25  | HOXB7      |
| 8   | PON2       | 26  | BPGM       |
| 9   | PTGER3     | 27  | BEX2       |
| 10  | CACNA2D1   | 28  | HOXD10     |
| 11  | HPGD       | 29  | TRAM1L1    |
| 12  | UBASH3B    | 30  | PON3       |
| 13  | NMNAT3     | 31  | HOXD8      |
| 14  | SLC1A3     | 32  | SLC1A6     |
| 15  | INSIG2     | 33  | CYP39A1    |
| 16  | SLURP1     | 34  | HOXD11     |
| 17  | LRP12      | 35  | PITX2      |
| 18  | WFDC21P    | 36  | ZIC2       |

**Supplementary Table 5 KEGG pathway analysis for 9 feature genes**

| ID       | Pathway                                  | Q-value           | geneID |
|----------|------------------------------------------|-------------------|--------|
| hsa00260 | Glycine, serine and threonine metabolism | 0.043934637558643 | BPGM   |
| hsa00010 | Glycolysis / Gluconeogenesis             | 0.043934637558643 | BPGM   |
| hsa04721 | Synaptic vesicle cycle                   | 0.043934637558643 | SLC1A3 |
| hsa04350 | TGF-beta signaling pathway               | 0.043934637558643 | PITX2  |
